# Supplementary material
Source: Springer Nature journal article supplement (https://www.springermedizin.de/resource/supplementary/12889_2009_2266_MOESM6_ESM.pdf/9485198)

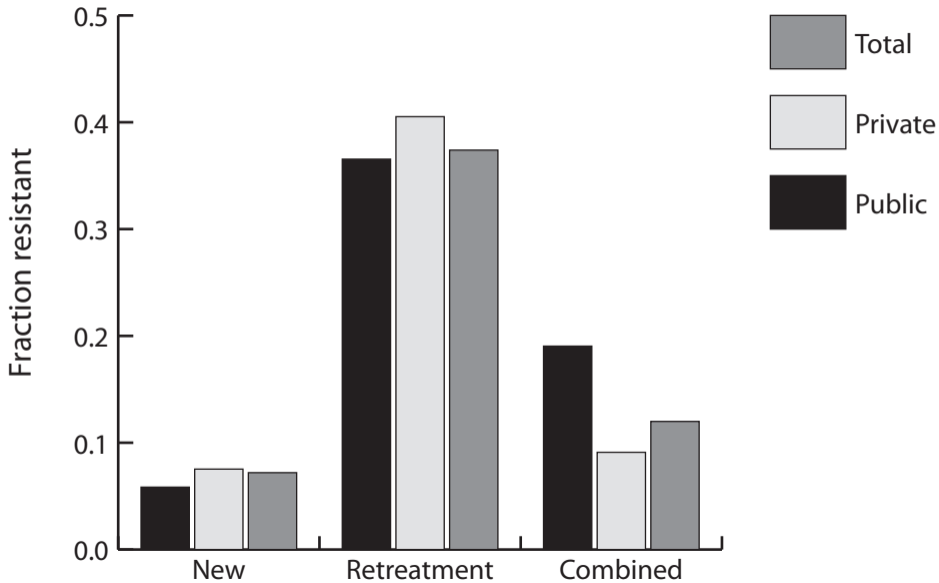

Supplement: MOESM6 [file 9485198]
